# Supplementary material for: From aggregation-induced to solution emission: a new strategy for designing ratiometric fluorescent probes and its application for in vivo HClO detection
Source: Royal Society of Chemistry journal article supplement (doi:10.1039/c8an01950a), 2019-01-01
Supplement: c8an01950a1.pdf [file c8an01950a1.pdf]

## Supporting Information

### **From aggregation-induced to solution emission: A new strategy for designing ratiometric fluorescent probes and its application for *in vivo* HClO detection**

Rongguang shi, <sup>a</sup> Hua Chen, <sup>b</sup> Yunpeng Qi, <sup>b</sup> Wei Huang, <sup>\*a</sup> Gui Yin<sup>\*a</sup> and Ruiyong Wang<sup>\*b</sup>

- a. *State Key Laboratory of Coordination Chemistry, State Key Laboratory of Analytical Chemistry for Life Science, School of Chemistry and Chemical Engineering, Nanjing University, Nanjing, 210093, People's Republic of China. E-mail: whuang@nju.edu.cn, yingui@nju.edu.cn.*
- b. *State Key Laboratory of Pharmaceutical Biotechnology, School of Life Science, Nanjing University, Nanjing, 210093, People's Republic of China. E-mail: wangry@nju.edu.cn.*

## **Contents**

1. Fluorescence and UV-vis spectra affected by AIE
2. Mechanism research
3. Detection limit calculation
4. Determination of reaction time
5. pH-dependent research
6. Cytotoxicity study
7. Cell imaging
8. Crystal data of PDAM-Me
9. Supplemental spectra

## 1. Fluorescence and UV-vis spectra affected by AIE

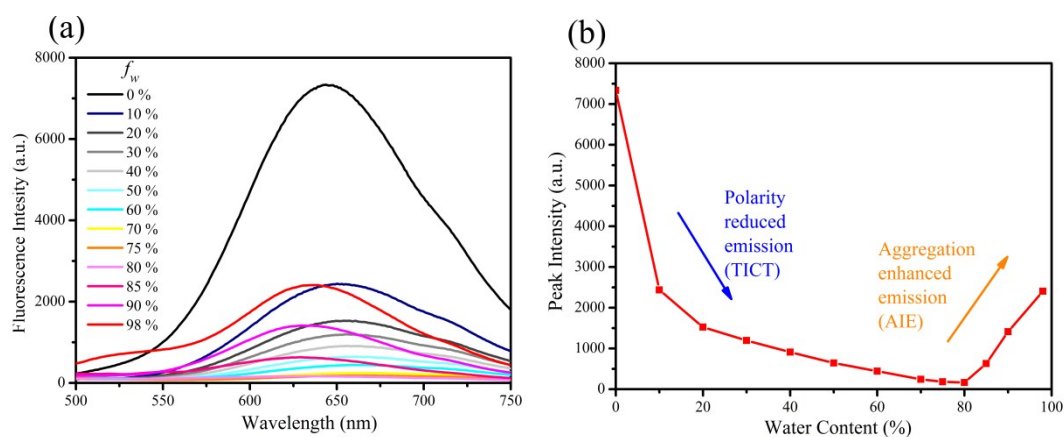

Fig. S1 (a) Fluorescence spectra of PDAM-Me in the MeCN-water mixtures with different water contents ( $\lambda_{\text{ex}} = 410$  nm). (b) Fluorescence peak intensity of PDAM-Me *versus* water content of the solvent mixture.

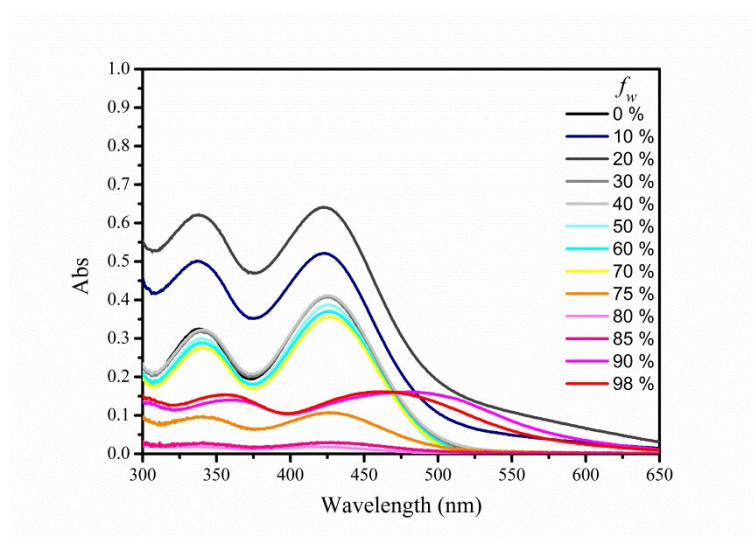

Fig. S2 UV-vis spectra of PDAM-Lyso (20  $\mu\text{M}$ ) in  $\text{CH}_3\text{CN}$ , upon increasing volume percentages of water from 0% to 98%.

## 2. Mechanism research

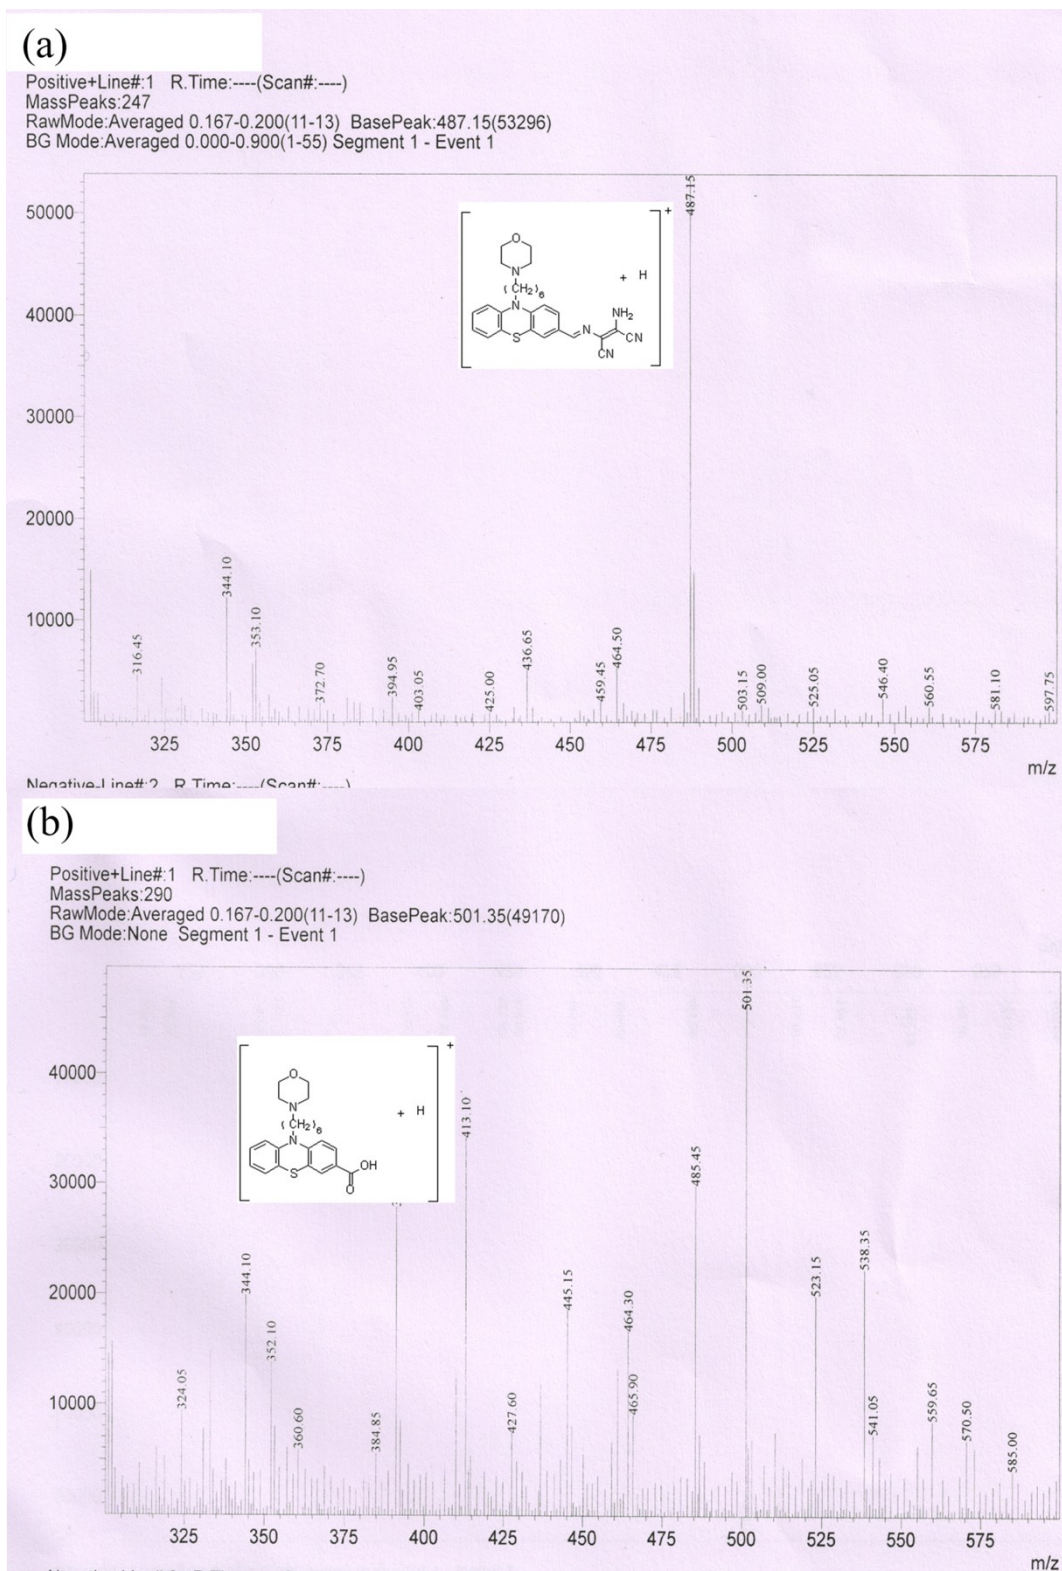

Fig.S3 (a) LCMS spectra of PDAM-Lyso. (b) LCMS spectra of PDAM-Lyso + NaClO.

### 3. Detection limit calculation

Fluorescence titration was carried out in CH<sub>3</sub>CN/PBS buffer (1/9, v/v, 10 mM, pH = 7.4) to determine the detection limit, which was then calculated with the equation:

$$\text{Detection of limit} = 3b_i/m$$

where  $b_i$  is the standard deviation of blank measurements and is calculated with twenty ( $n = 20$ ) experiments, and  $m$  is the slope between intensity ration ( $I_{470}/I_{620}$ ) and sample concentration. It was calculated that the detection limit was 440 nm.

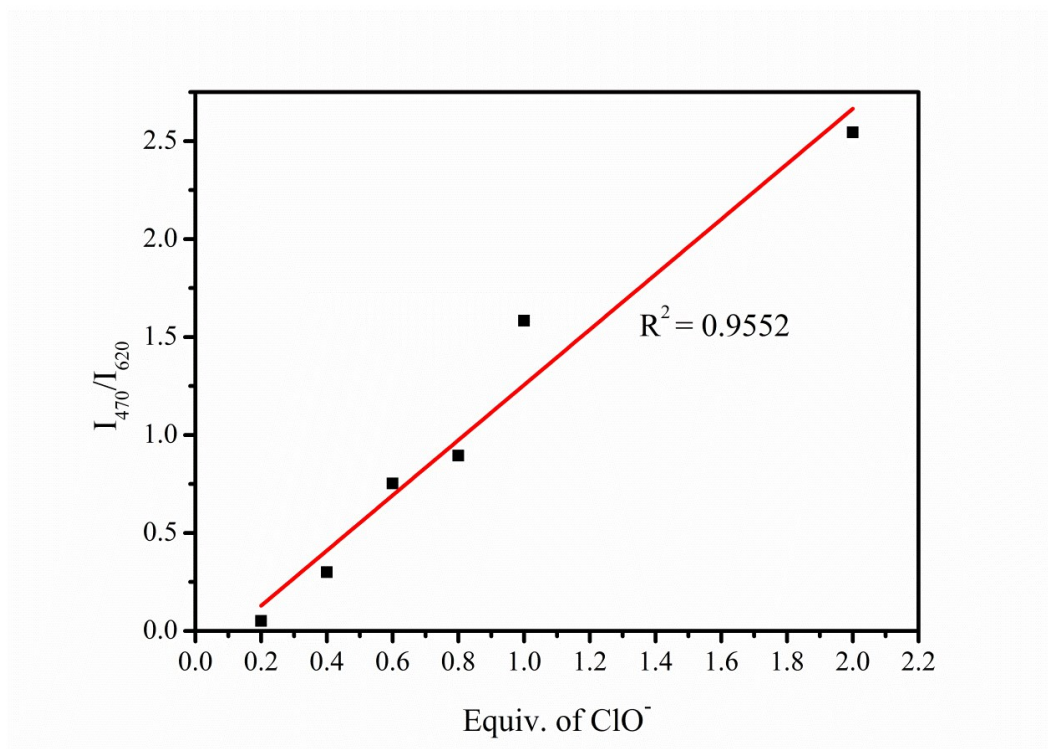

Fig. S4 The dependence curve of fluorescence intensity ratios ( $I_{470}/I_{620}$ ) in the presence of ClO<sup>-</sup> in CH<sub>3</sub>CN/PBS buffer (1/9, v/v, 10 mM, pH = 7.4), ( $\lambda_{\text{ex}} = 410$  nm).

#### 4. Determination of reaction time

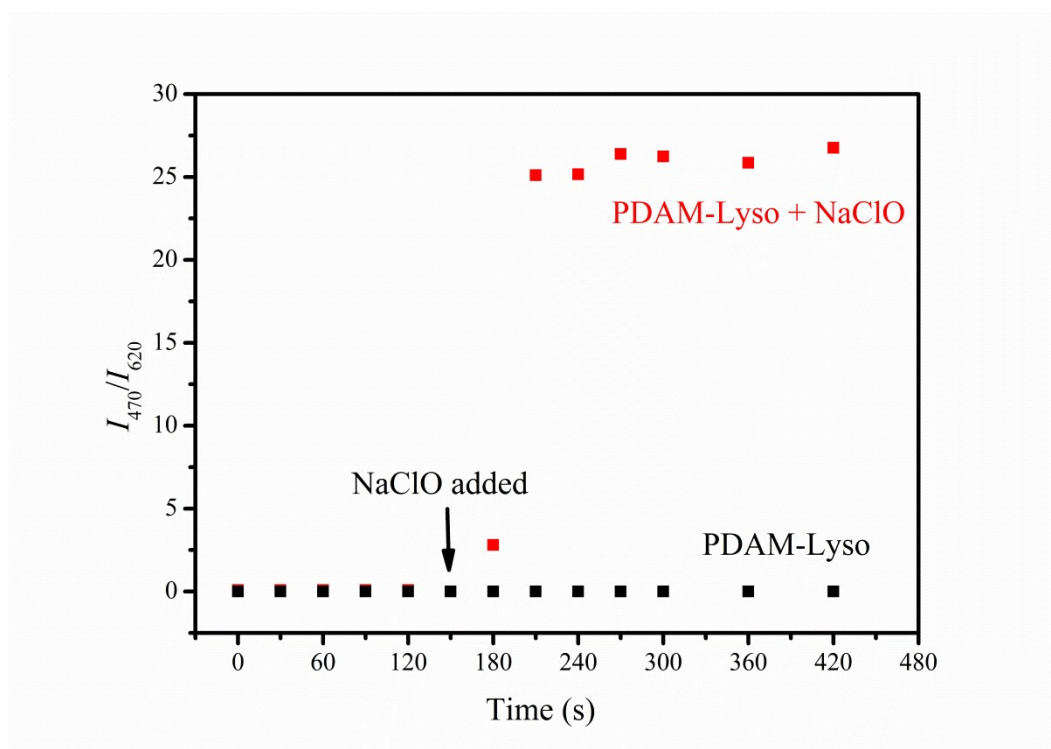

Fig. S5 Reaction-time profiles of PDAM-Lyso (20  $\mu$ M) in the absence and presence of NaClO in  $\text{CH}_3\text{CN}/\text{PBS}$  buffer (1/9, v/v, 10 mM, pH = 7.4) ( $\lambda_{\text{ex}}$ =410 nm).

## 5. pH-dependent research

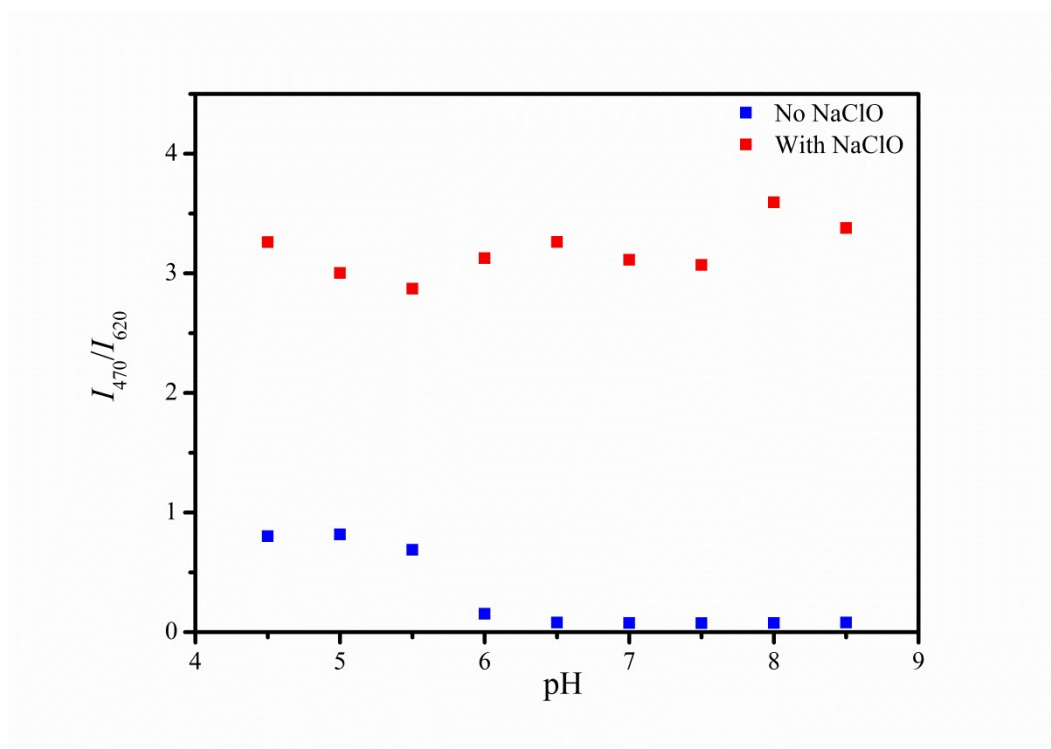

Fig. S6 pH-dependent profiles of PDAM-Lyso (20  $\mu$ M) in the absence and presence of NaClO (2.5 eq.) with pH range of 4.5 – 8.5 in  $\text{CH}_3\text{CN}/\text{PBS}$  buffer (1/9, v/v, 10 mM) ( $\lambda_{\text{ex}}$ =410 nm).



## 6. Cytotoxicity study

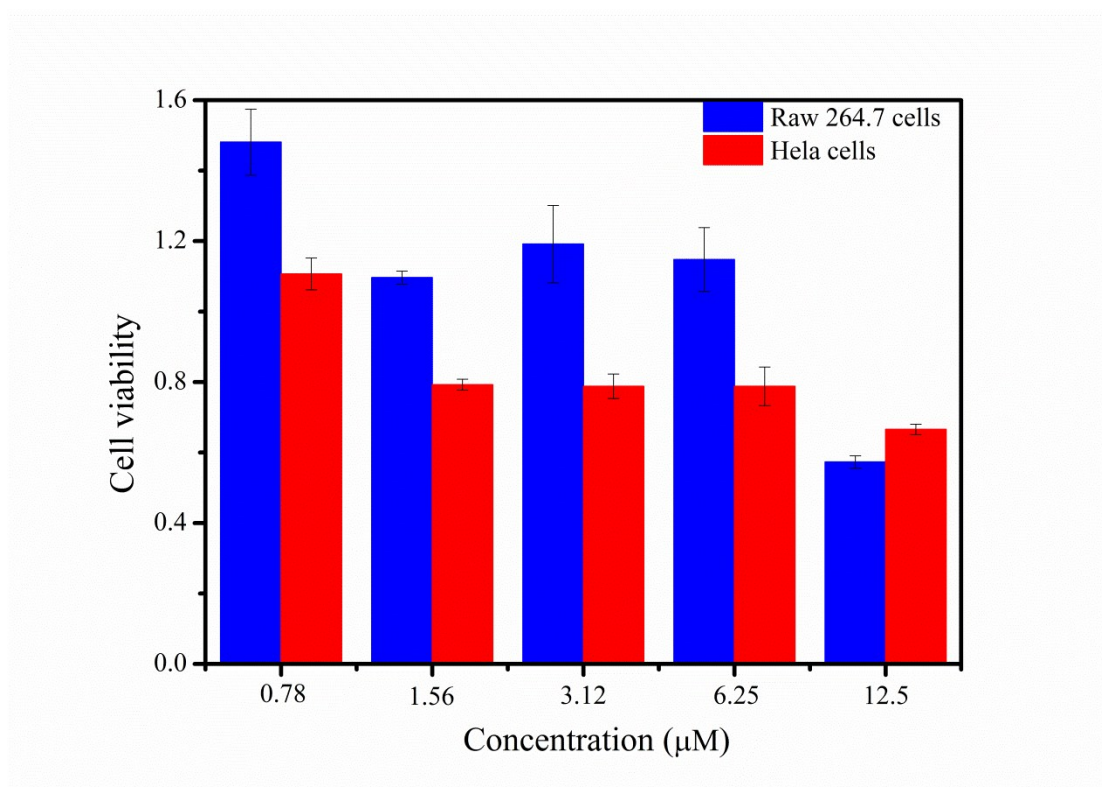

Fig. S7 Cytotoxicity data of PDAM-Lyso for Raw264.7 cells (blue) and HeLa cells (red).

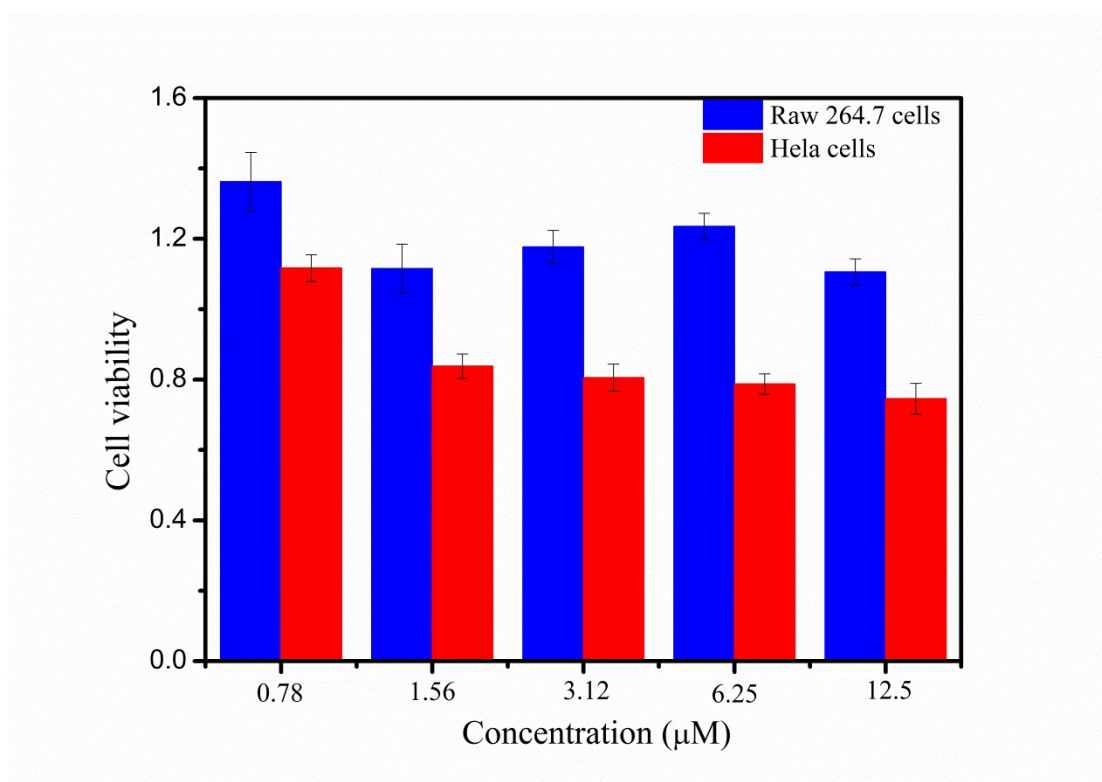

Fig. S8 Cytotoxicity data of PDAM-Me for Raw264.7 cells (blue) and HeLa cells (red).



## 7. Cell imaging

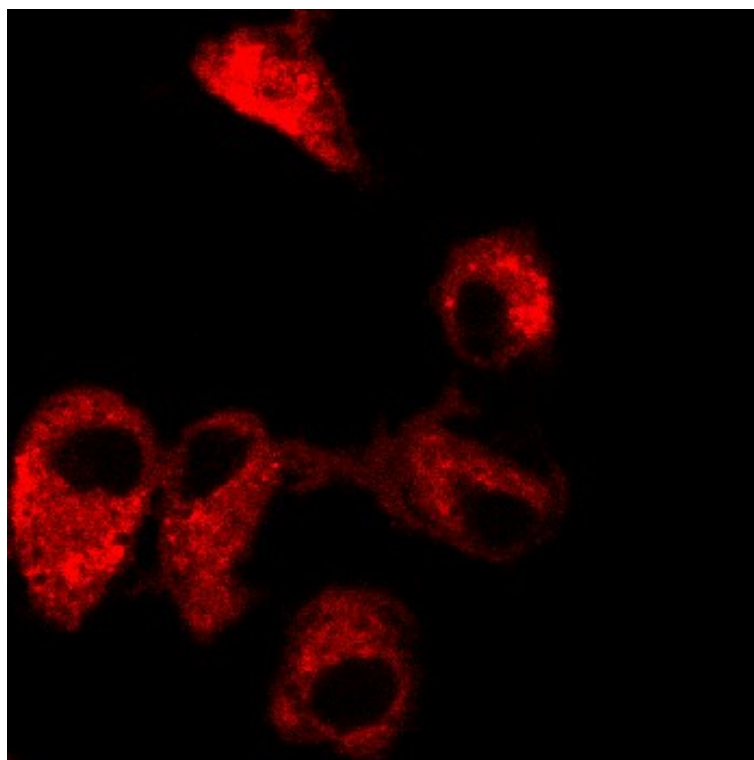

Fig. S9 Confocal fluorescent images of HeLa cells of PDAM-Lyso and Lyso-Tracker red ( $\lambda_{\text{ex}} = 405$  nm,  $\lambda_{\text{em}} = 560 - 690$  nm).

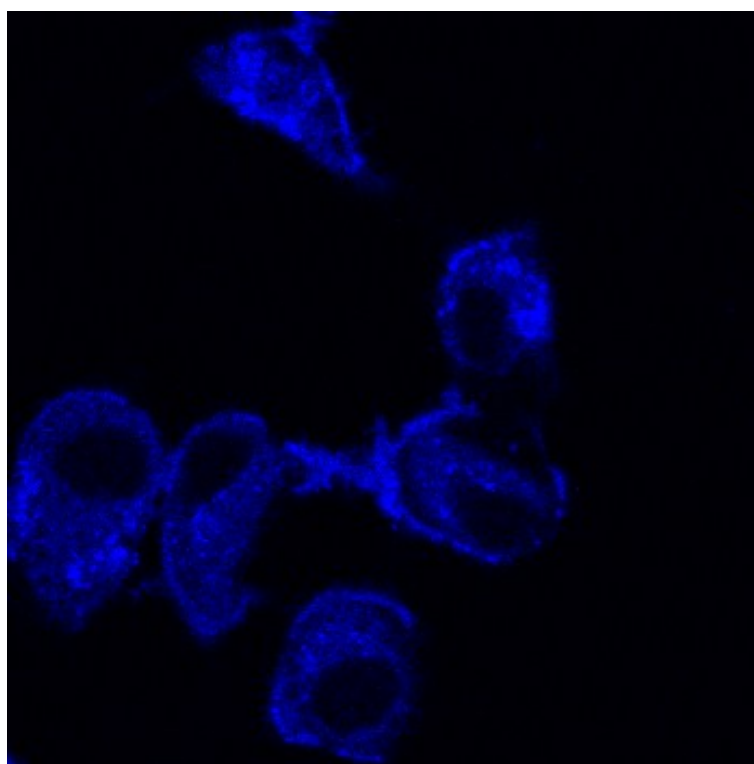

Fig. S10 Confocal fluorescent images of HeLa cells of PDAM-Lyso and Lyso-Tracker red ( $\lambda_{\text{ex}} = 405$  nm,  $\lambda_{\text{em}} = 430 - 560$  nm).

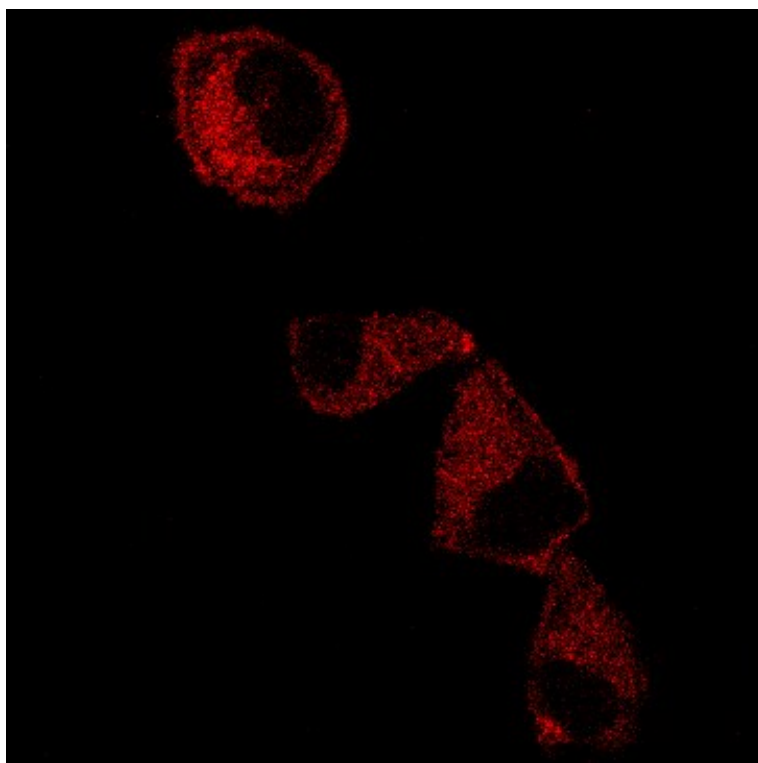

Fig. S11 Confocal fluorescent images of HeLa cells of PDAM-Me and Lyso-Tracker red ( $\lambda_{\text{ex}} = 405$  nm,  $\lambda_{\text{em}} = 560 - 690$  nm).

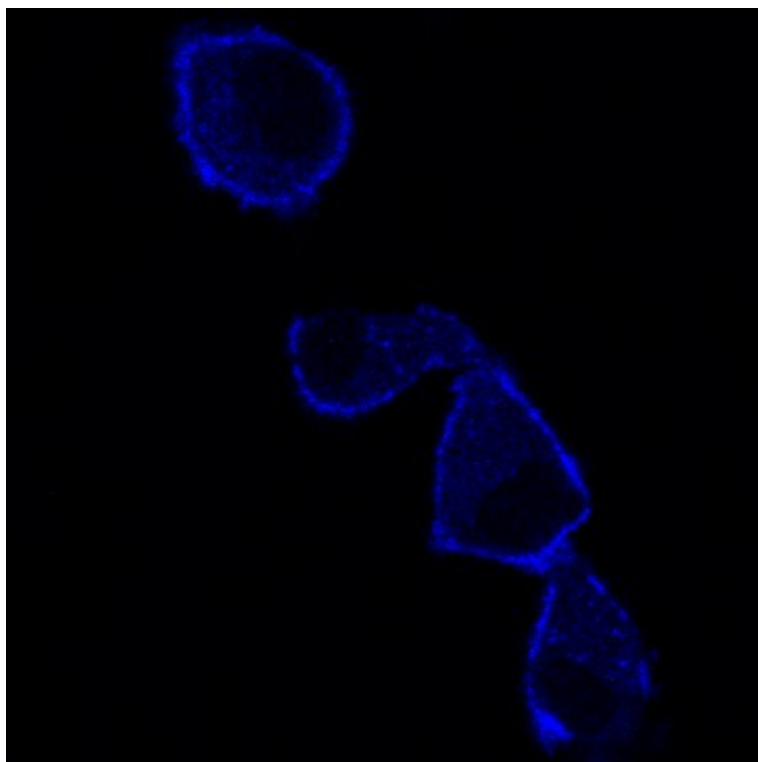

Fig. S12 Confocal fluorescent images of HeLa cells of PDAM-Me and Lyso-Tracker red ( $\lambda_{\text{ex}} = 405$  nm,  $\lambda_{\text{em}} = 430 - 560$  nm).

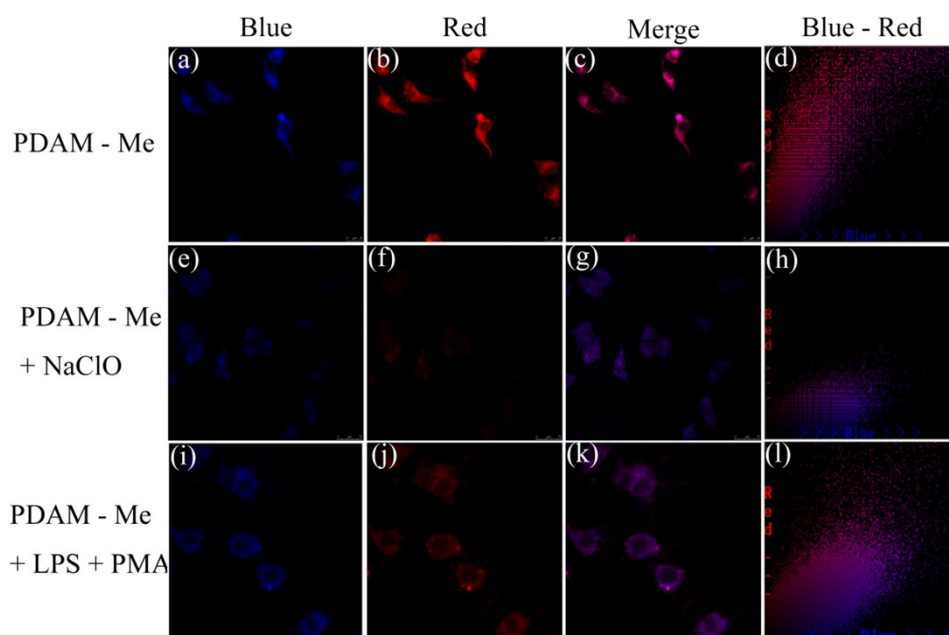

Fig. S13 Confocal fluorescence images of PDAM-Me in cells ( $\lambda_{\text{ex}} = 410 \text{ nm}$ ). (a) HeLa cells, PDAM-Me ( $3.0 \mu\text{M}$ ),  $420 - 550 \text{ nm}$ ; (b) HeLa cells, PDAM-Me ( $3.0 \mu\text{M}$ ),  $570 - 700 \text{ nm}$ ; (c) The overlay of (a) and (b); (d) The scatter distributing plot of (c). (e) HeLa cells, PDAM-Me ( $3.0 \mu\text{M}$ ), NaClO ( $60 \mu\text{M}$ ),  $420 - 550 \text{ nm}$ ; (f) HeLa cells, PDAM-Me ( $3.0 \mu\text{M}$ ), NaClO ( $60 \mu\text{M}$ ),  $570 - 700 \text{ nm}$ ; (g) The overlay of (e) and (f); (h) The scatter distributing plot of (g). (i) Raw 264.7 cells, PDAM-Me ( $3.0 \mu\text{M}$ ), LPS ( $1.0 \mu\text{g/mL}$ ), PMA ( $1.0 \mu\text{g/mL}$ ),  $420 - 550 \text{ nm}$ ; (j) Raw 264.7 cells, PDAM-Me ( $3.0 \mu\text{M}$ ), LPS ( $1.0 \mu\text{g/mL}$ ), PMA ( $1.0 \mu\text{g/mL}$ ),  $570 - 700 \text{ nm}$ ; (k) The overlay of (i) and (j); (l) The scatter distributing plot of (k).

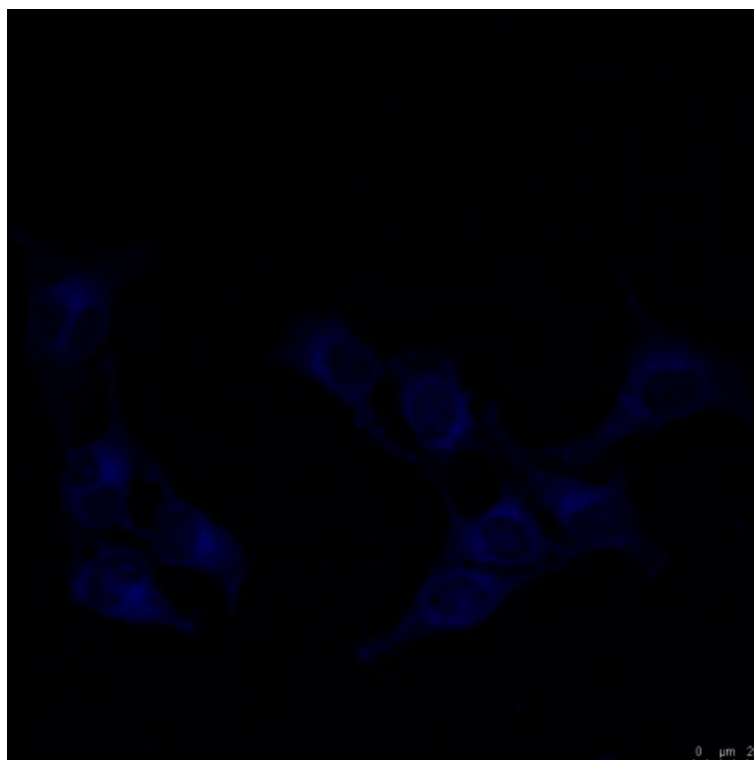

Fig. S14 Confocal fluorescent images of PDAM-Lyso (3.0 μM) in HeLa cells ( $\lambda_{\text{ex}} = 410 \text{ nm}$ ,  $\lambda_{\text{em}} = 420 - 550 \text{ nm}$ ).

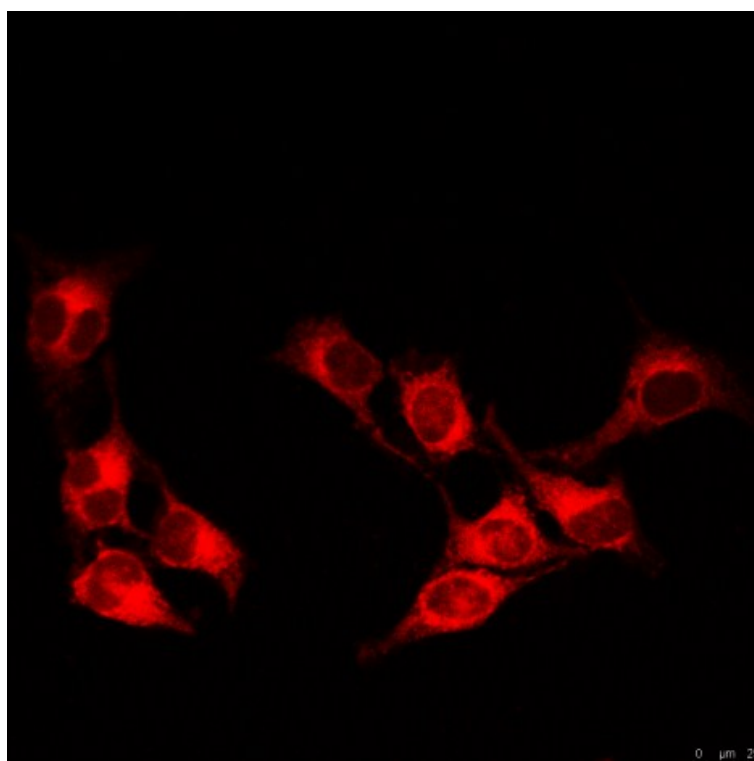

Fig. S15 Confocal fluorescent images of PDAM-Lyso (3.0 μM) in HeLa cells ( $\lambda_{\text{ex}} = 410 \text{ nm}$ ,  $\lambda_{\text{em}} = 570 - 700 \text{ nm}$ ).

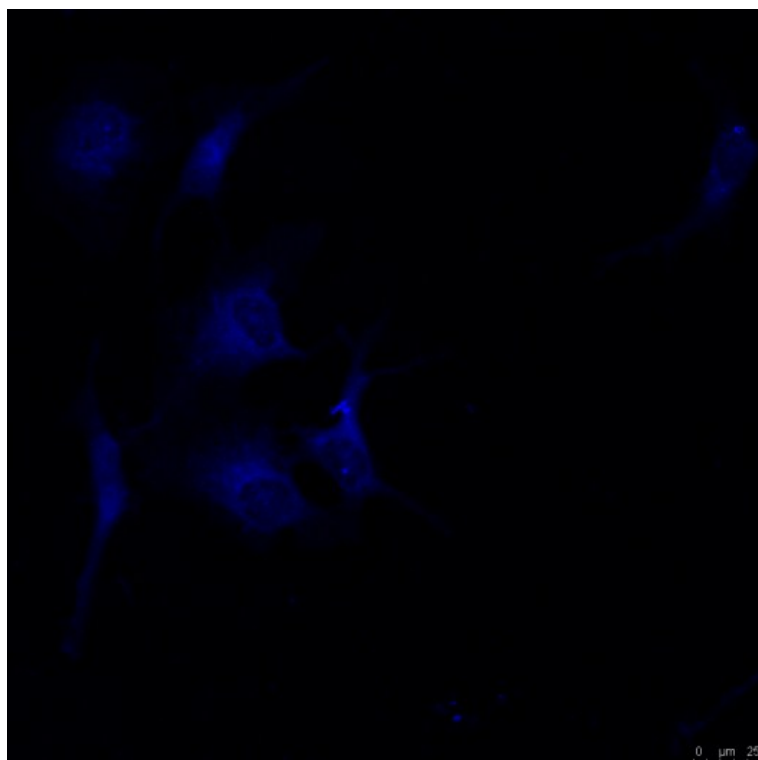

Fig. S16 Confocal fluorescent images of PDAM-Lyso (3.0  $\mu\text{M}$ ) in HeLa cells with the existence of NaClO (60  $\mu\text{M}$ ) ( $\lambda_{\text{ex}} = 410 \text{ nm}$ ,  $\lambda_{\text{em}} = 420 - 550 \text{ nm}$ ).

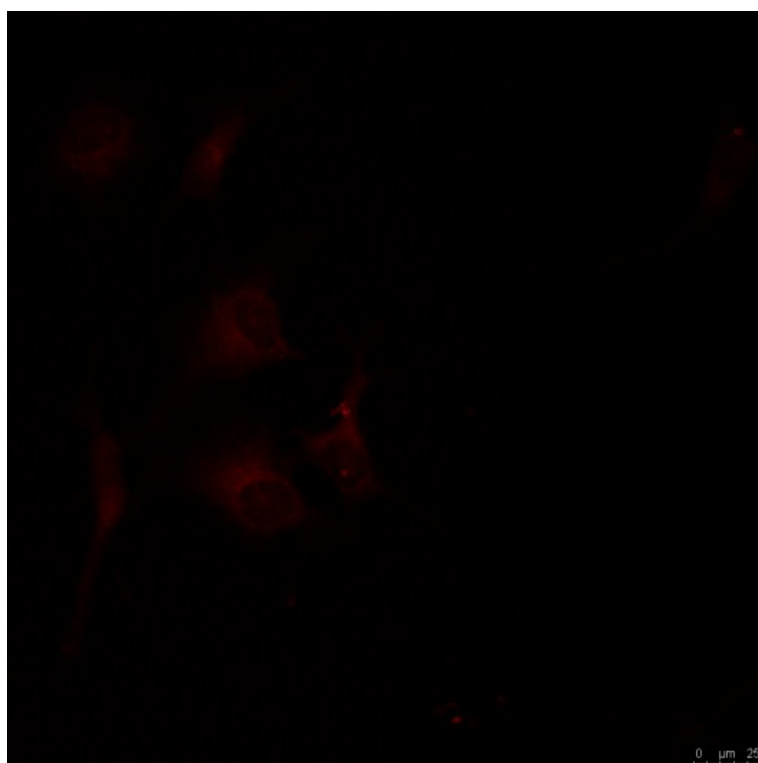

Fig. S17 Confocal fluorescent images of PDAM-Lyso (3.0  $\mu\text{M}$ ) in HeLa cells with the existence of NaClO (60  $\mu\text{M}$ ) ( $\lambda_{\text{ex}} = 410 \text{ nm}$ ,  $\lambda_{\text{em}} = 570 - 700 \text{ nm}$ ).

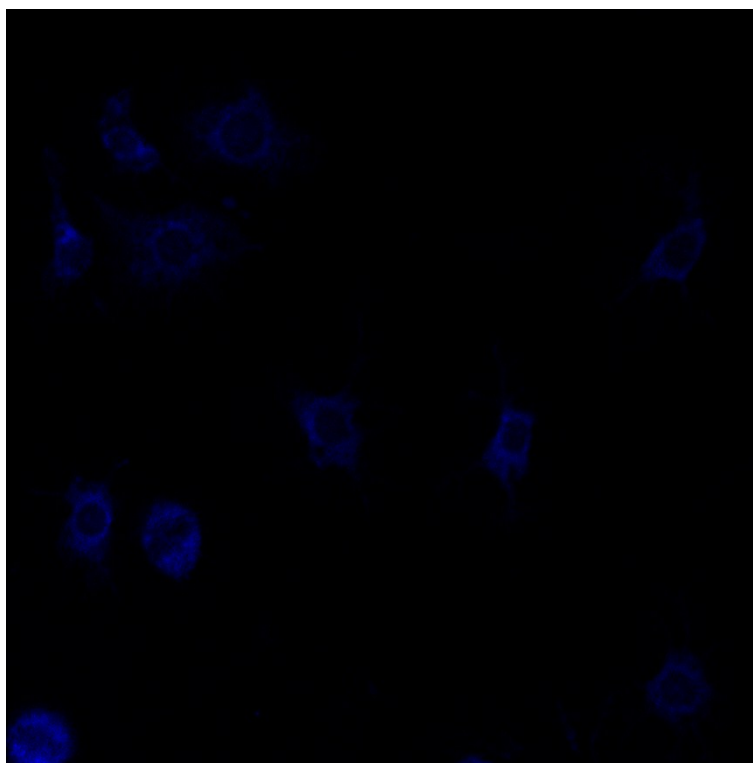

Fig. S18 Confocal fluorescent images of PDAM-Lyso (3.0  $\mu\text{M}$ ) in Raw 264.7 cells with LPS (1.0  $\mu\text{g/mL}$ ) and PMA (1.0  $\mu\text{g/mL}$ ) cells ( $\lambda_{\text{ex}} = 410 \text{ nm}$ ,  $\lambda_{\text{em}} = 420 - 550 \text{ nm}$ ).

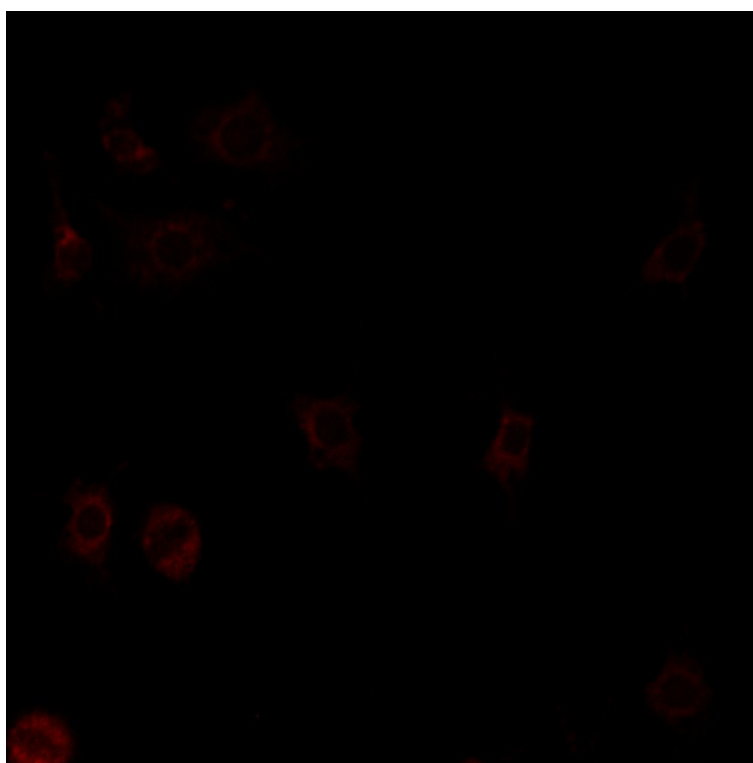

Fig. S19 Confocal fluorescent images of PDAM-Lyso (3.0  $\mu\text{M}$ ) in Raw 264.7 cells with LPS (1.0  $\mu\text{g/mL}$ ) and PMA (1.0  $\mu\text{g/mL}$ ) cells ( $\lambda_{\text{ex}} = 410 \text{ nm}$ ,  $\lambda_{\text{em}} = 570 - 700 \text{ nm}$ ).



## 8. Crystal data of PDAM-Me

Table S1 Crystal data of compound PDAM-Me

| Compound                                        | PDAM-Me                                          |
|-------------------------------------------------|--------------------------------------------------|
| Empirical formula                               | C <sub>18</sub> H <sub>13</sub> N <sub>5</sub> S |
| Formula weight                                  | 331.39                                           |
| Crystal system                                  | monoclinic                                       |
| Space group                                     | <i>P</i> 2 <sub>1</sub> / <i>c</i>               |
| <i>a</i> [Å]                                    | 18.09(2)                                         |
| <i>b</i> [Å]                                    | 6.977(9)                                         |
| <i>c</i> [Å]                                    | 13.863(19)                                       |
| $\alpha$ [°]                                    | 90                                               |
| $\beta$ [°]                                     | 109.407(12)                                      |
| $\gamma$ [°]                                    | 90                                               |
| <i>V</i> [Å <sup>3</sup> ]                      | 1650(4)                                          |
| <i>Z</i>                                        | 4                                                |
| <i>T</i> [K]                                    | 291(2)                                           |
| <i>D</i> <sub>calcd</sub> [g·cm <sup>-3</sup> ] | 1.334                                            |
| <i>F</i> (000)                                  | 688                                              |
| $\mu$ [mm <sup>-1</sup> ]                       | 0.205                                            |
| $\theta$ range[°]                               | 2.388 - 24.999                                   |
| <i>R</i> <sub>1</sub>                           | 0.1562                                           |
| <i>wR</i> <sub>2</sub>                          | 0.4408                                           |
| <i>S</i>                                        | 1.124                                            |

Table S2 Intermolecular hydrogen bonding parameters (Å, °) in PDAM-Me

| D–H···A     | D–H  | H···A | D···A ( <i>d</i> ) | $\angle$ DHA | Symmetry code                               |
|-------------|------|-------|--------------------|--------------|---------------------------------------------|
| N5–H5A···N3 | 0.86 | 2.22  | 3.031(15)          | 157          | <i>x</i> , -1+ <i>y</i> , <i>z</i>          |
| N5–H5B···N4 | 0.86 | 2.19  | 3.028(14)          | 166          | - <i>x</i> , -1/2+ <i>y</i> , 1/2- <i>z</i> |

## 9. Supplemental spectra

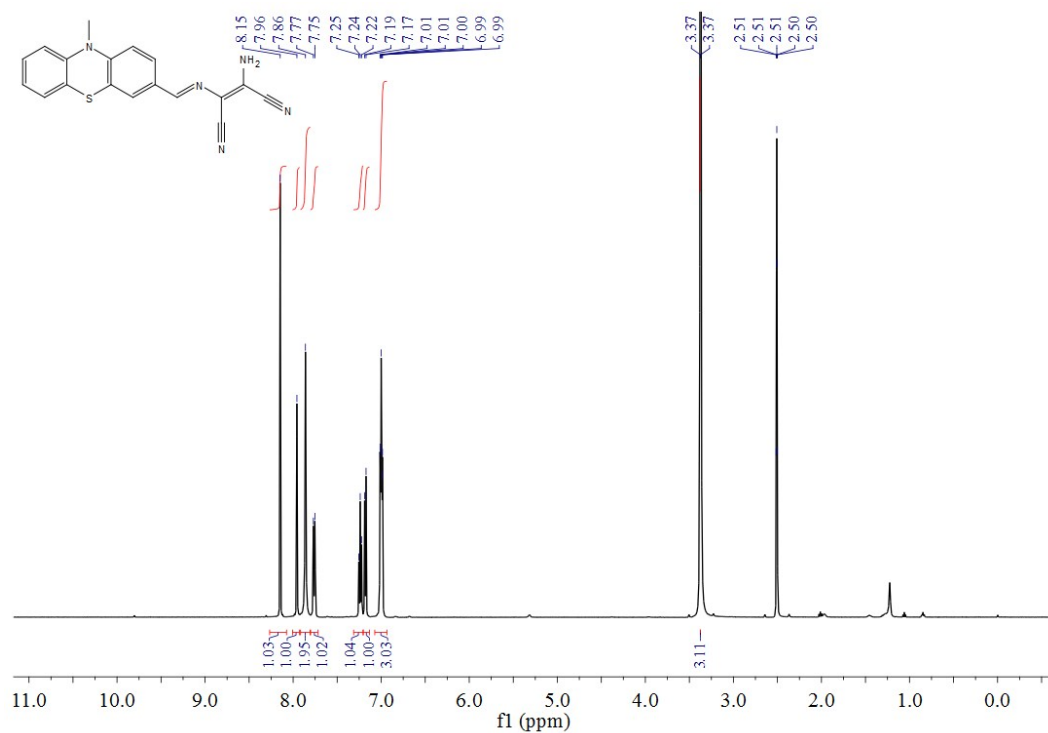

<sup>1</sup>H NMR spectrum of PDAM-Me.

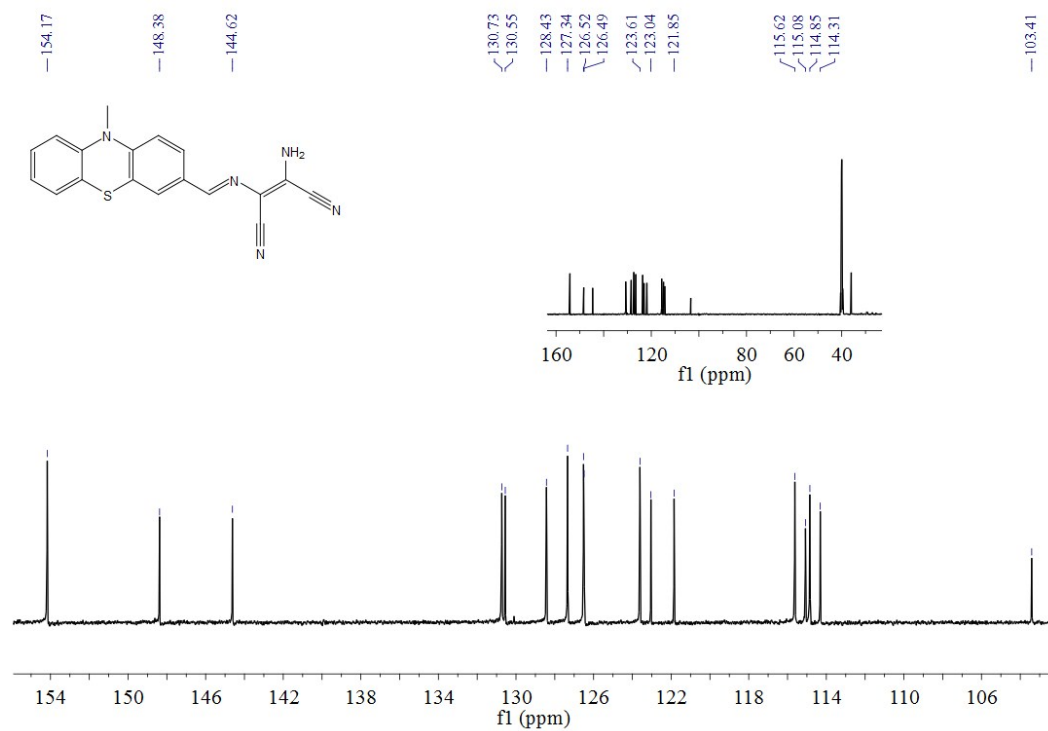

<sup>13</sup>C NMR spectrum of PDAM-Me.

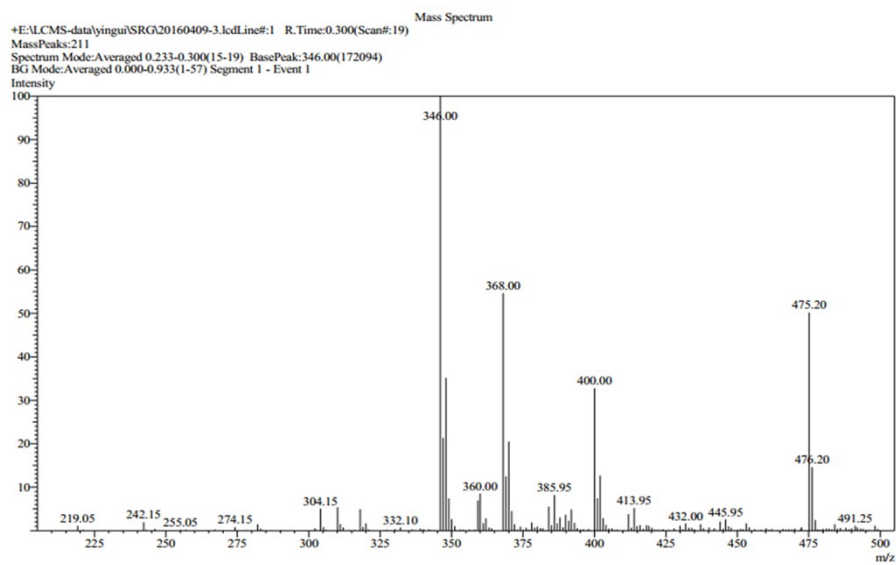

ESI

-MS spectrum of the compound 4.

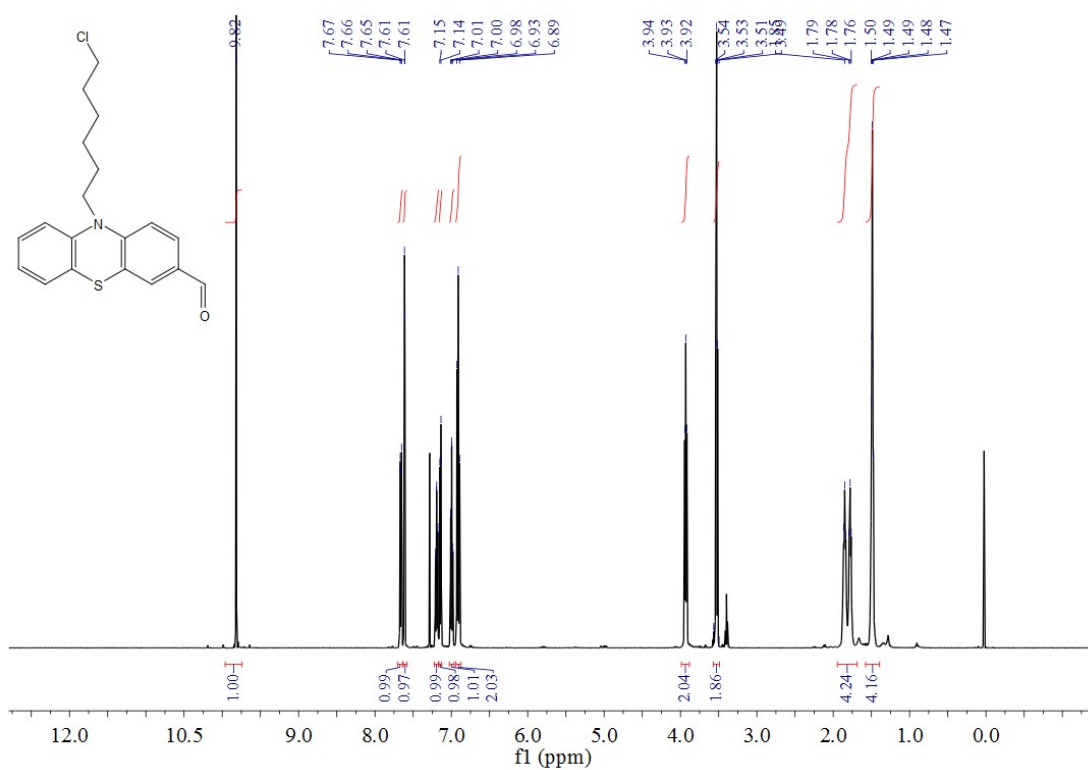

<sup>1</sup>H NMR spectrum of compound 4.

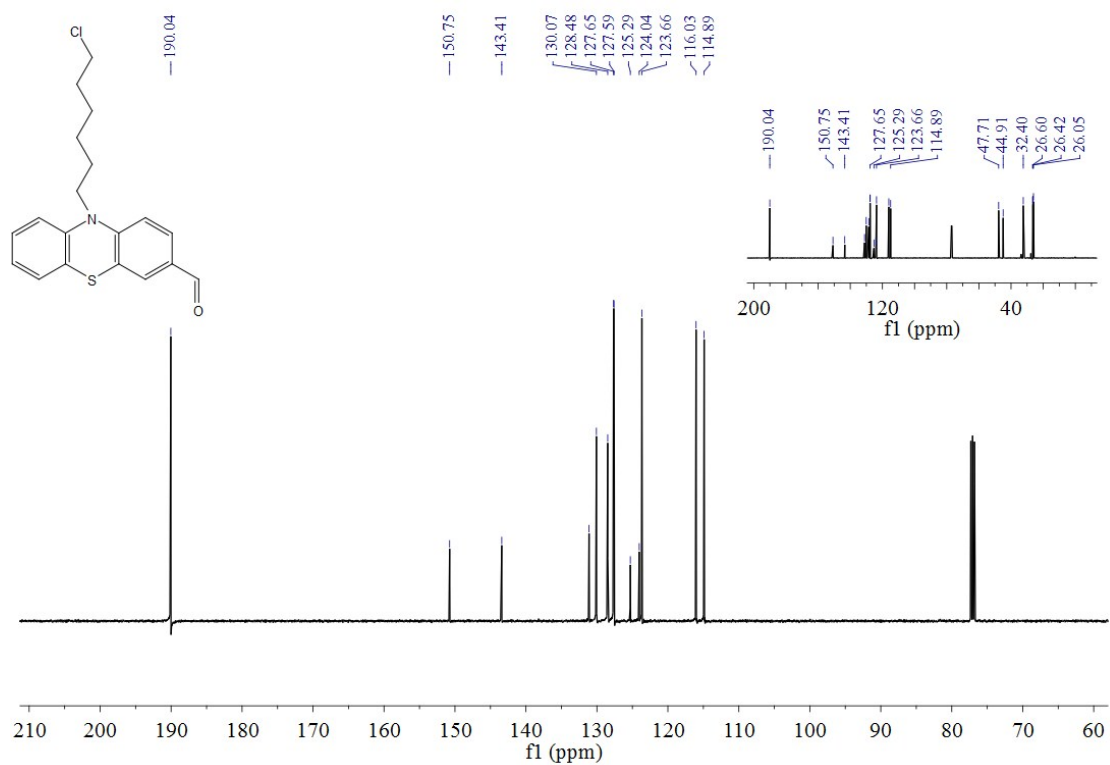

$^{13}\text{C}$  NMR spectrum of compound 4.

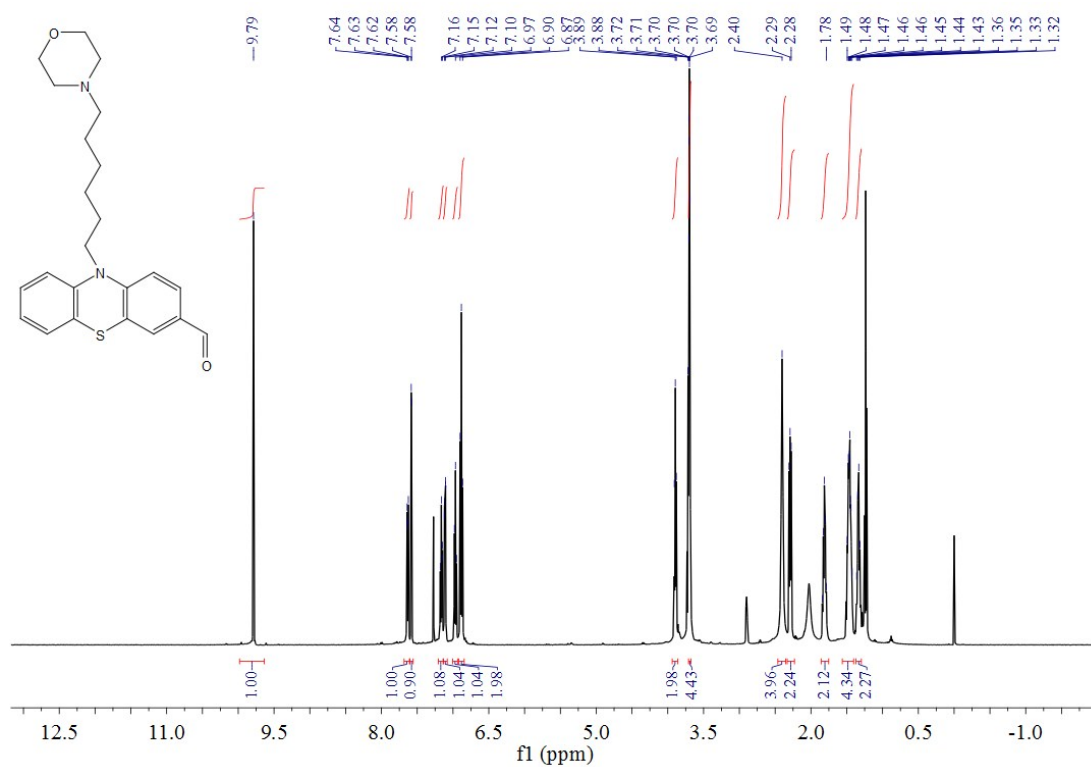

$^1\text{H}$  NMR spectrum of compound 5.

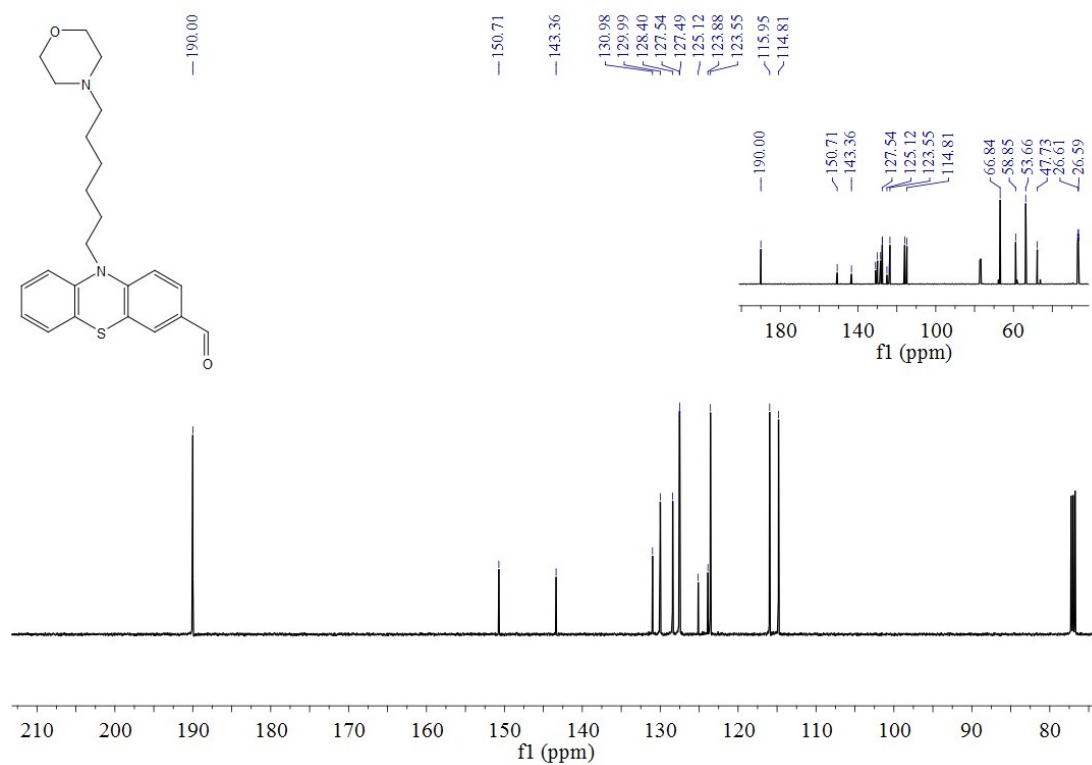

<sup>13</sup>C NMR spectrum of compound 5.

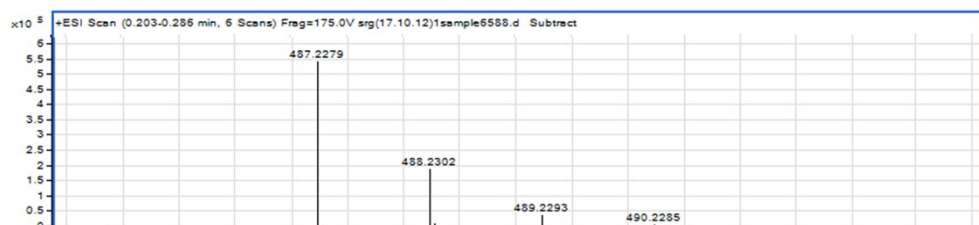

-MS spectrum (positive) of PDMA-Lyso.

HR

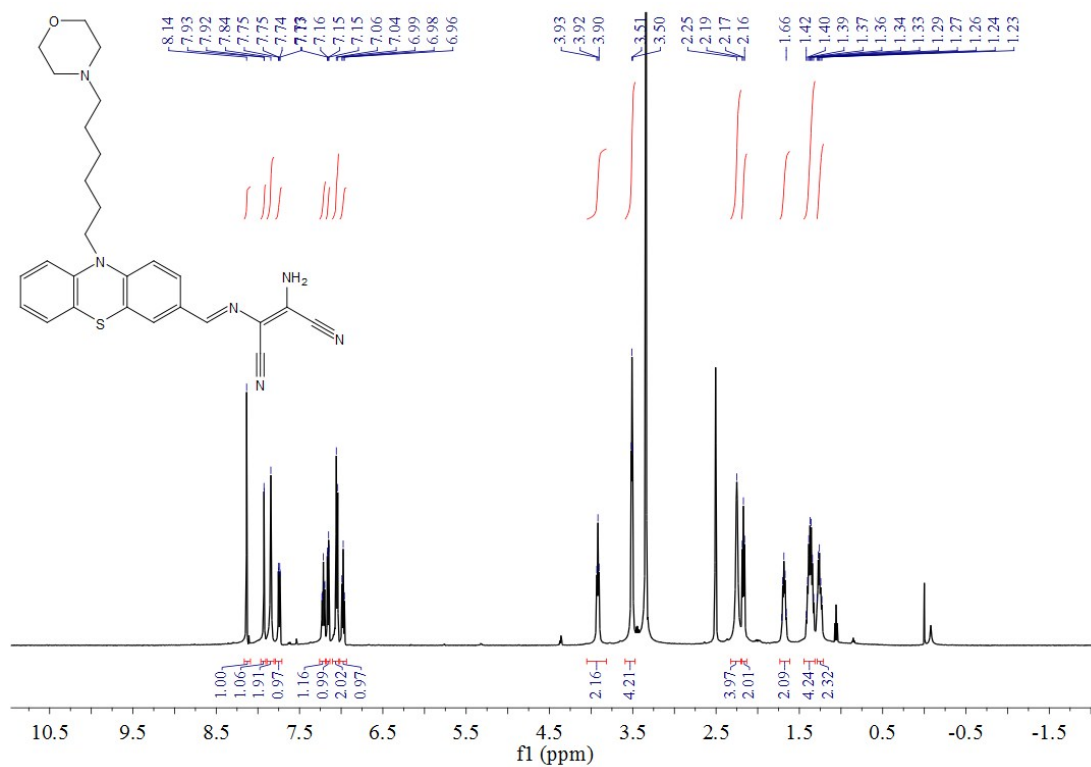

<sup>1</sup>H NMR spectrum of PDMA-Lyso.

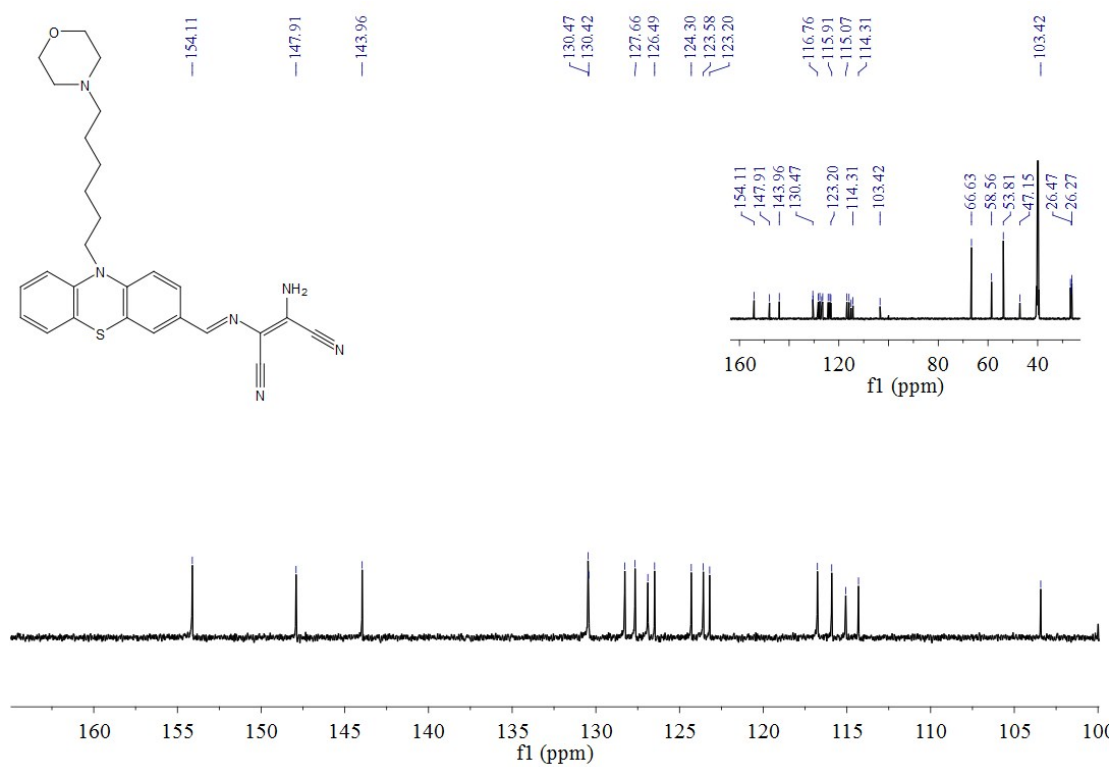

<sup>13</sup>C NMR spectrum of PDMA-Lyso.
